# Supplementary material
Source: Royal Society of Chemistry journal article supplement (doi:10.1039/d6cc01915c)
Supplement: d6cc01915c1.pdf [file d6cc01915c1.pdf]

## Supplementary Information

### **Interfacial Charge Redistribution in Hollow Fe<sub>3</sub>C/MoN Heterostructures Promotes Bifunctional Electrocatalysis for Alkaline Zinc-Air Batteries**

Tailin Ji,<sup>†</sup> Xinyu Yang,<sup>†</sup> and Xinxin Xu\*

Department of Chemistry, College of Sciences, Northeastern University, Shenyang 110819, Liaoning, China. Email: xuxx@mail.neu.edu.cn

<sup>†</sup> These authors contributed equally to this work.

## Materials

Fumaric acid ( $C_4H_4O_4$ , 99%, AR), iron(III) nitrate nonahydrate ( $Fe(NO_3)_3 \cdot 9H_2O$ , 99%, AR), dicyandiamide (DCDA,  $C_2H_4N_4$ , 99%, AR), nickel(II) chloride hexahydrate ( $NiCl_2 \cdot 6H_2O$ , 99%, AR), ammonium molybdate ( $(NH_4)_6Mo_7O_{24} \cdot 4H_2O$ , 99%, AR), Zinc acetate dihydrate ( $Zn(Ac)_2 \cdot 2H_2O$ , 99%, AR), potassium hydroxide (KOH, 99%, AR), N,N'-methylenebisacrylamide (MBAA, 99%, AR), potassium persulfate ( $K_2S_2O_8$ , 99%, AR), ammonia solution ( $NH_3 \cdot H_2O$ , AR), and acrylic acid (AA,  $C_3H_4O_2$ , AR) were purchased from Beijing Innochem Science & Technology Co., Ltd. All the chemicals were used as received without further purification. All standard solutions were prepared with Milli-Q water with a resistivity of  $18 \text{ M}\Omega \cdot \text{cm}$ .

## The synthesis of MIL-88A

MIL-88A was synthesized via a hydrothermal method. Typically, 139 mg of fumaric acid was dissolved in 25 mL of deionized water at  $70^\circ\text{C}$  under stirring for 10 min to form a clear solution. Subsequently, 525 mg of  $Fe(NO_3)_3 \cdot 9H_2O$  was added, and the mixture was continuously stirred for another 10 min. The resulting homogeneous solution was then transferred into a Teflon-lined stainless-steel autoclave and maintained at  $110^\circ\text{C}$  for 6 h. After naturally cooling to room temperature, the obtained precipitate was collected by centrifugation, thoroughly washed with deionized water and absolute ethanol several times to remove residual reactants, and finally dried in an oven at  $80^\circ\text{C}$  to obtain MIL-88A.

## The synthesis of $NiMo_6$ polyoxometalate

Nickel-containing Anderson-type polyoxometalate ( $NiMo_6$ ) was synthesized via a facile coprecipitation method at ambient conditions. Typically, an aqueous solution of  $(NH_4)_6Mo_7O_{24} \cdot 4H_2O$  was first prepared and used as the molybdenum source. Subsequently,  $NiCl_2 \cdot 6H_2O$  was dissolved in deionized water and added dropwise into

the above solution under continuous stirring, maintaining a Mo: Ni molar ratio of 6:1. After complete mixing, dilute ammonia solution was introduced to adjust the pH of the system to 5–6, where the Anderson-type structure is thermodynamically favored. Under this mildly acidic to near-neutral condition, a coprecipitation process occurred, leading to the formation of the target  $\text{NiMo}_6$  polyoxometalate ammonium salt. The resulting precipitate was collected by filtration, thoroughly washed with deionized water to remove residual ions, and finally dried at room temperature to obtain the final product.

### **The synthesis of hollow Mo@MIL-88A intermediate**

The hollow Mo@MIL-88A intermediate was prepared via a  $\text{NiMo}_6$ -assisted etching process. Typically, 100 mg of MIL-88A and 100 mg of  $\text{NiMo}_6$  were dispersed in 30 mL of deionized water under stirring for 30 min. The resulting suspension was then transferred into a 50 mL Teflon-lined stainless-steel autoclave and heated at  $120^\circ\text{C}$  for 1 h. After cooling naturally to room temperature, the product was collected by centrifugation, washed several times with deionized water and absolute ethanol, and dried in an oven at  $80^\circ\text{C}$  for further use.

### **The synthesis of $\text{Fe}_3\text{C}/\text{MoN}$**

The Mo@MIL-88A intermediate and DCDA were thoroughly ground in an agate mortar at a mass ratio of 1:20 to obtain a homogeneous mixture. The resulting powder was then placed in a tubular furnace and annealed at  $800^\circ\text{C}$  for 2 h under a  $\text{N}_2$  atmosphere. After cooling to room temperature under  $\text{N}_2$  protection, the final black powder was collected and denoted as  $\text{Fe}_3\text{C}/\text{MoN}$ . For comparison,  $\text{Fe}_3\text{C}$  and MoN were prepared by calcining MIL-88A and  $\text{NiMo}_6$ , respectively, under the same conditions.

## **Preparation of PAAK Gel Polymer Electrolyte**

1 g of poly(vinyl alcohol) (PVA) was dissolved in 20 mL of ultrapure water under stirring at 90°C for 2 h to obtain a homogeneous solution. After cooling to 60°C, 11 mL of 8.4 M potassium hydroxide solution, 0.025 g of N,N'-methylenebisacrylamide, and 10.08 g of acrylic acid were added, followed by stirring for 30 min at 60°C. Then 5 mL of 0.15 M potassium persulfate solution was added, followed by vigorous stirring for about 20 seconds. The resulting mixture was poured into a Petri dish to form a gel with a thickness of approximately 2–4 mm and dried at 60°C for 3 h. Finally, the obtained gel was immersed in a 6 M KOH + 0.2 M Zn(Ac)<sub>2</sub> solution for 24 h to obtain the PAAK gel polymer electrolyte.

## **Characterizations**

XRD patterns were recorded using a Philips X'Pert Pro Super X-ray diffractometer with Cu K $\alpha$  ( $\lambda = 1.5418 \text{ \AA}$ ) radiation. XPS measurements were performed using Mg K $\alpha$  radiation (1253.6 eV) as the excitation source (ESCALAB 250Xi, Thermo Fisher Scientific). UPS (PHI5000 VersaProbe III) was used to determine the work function. The bandgap of the sample was analyzed by UV-vis DRS (Shimadzu, UV-3600Plus). Morphology of the samples was observed using SEM (ultra plus, ZEISS) and TEM (JEOL, JEM-2100F). N<sub>2</sub> adsorption-desorption measurements were performed on a Micromeritics ASAP 2460 instrument at 77 K.

## **DFT Calculations**

DFT calculations were performed using the Vienna *ab initio* simulation package (VASP) within the generalized gradient approximation (GGA) and the Perdew–Burke–Ernzerhof (PBE) functional. The projector augmented wave (PAW) method was used, with a plane-wave cutoff energy of 500 eV. The electronic convergence criterion was set to 10<sup>-5</sup> eV, and the structures were relaxed until the forces on each

atom were below  $0.05 \text{ eV } \text{\AA}^{-1}$ . Grimme's DFT-D3 method was used to account for dispersion interactions. A vacuum layer of  $20 \text{ \AA}$  and a  $2 \times 2 \times 1$  Monkhorst–Pack k-point grid were adopted. Based on these calculations, the optimized structures of  $\text{Fe}_3\text{C}$ ,  $\text{MoN}$ , and  $\text{Fe}_3\text{C}/\text{MoN}$  were obtained, and the corresponding DOS was calculated with the Fermi level set to  $0 \text{ eV}$ .

### **Electrochemical Measurements**

Electrochemical measurements were conducted using a CHI-760E electrochemical workstation (Chenhua, Shanghai). For all electrochemical evaluations, including ORR, OER, ZAB, and FZAB tests, the commercial benchmark catalysts (Pt/C,  $\text{RuO}_2$ , or their mixture) were tested under identical conditions to  $\text{Fe}_3\text{C}/\text{MoN}$ , namely the same ink formulation, catalyst loading, electrode preparation procedure, and testing parameters.

### **RRDE test in ORR**

RRDE tests were conducted in an  $\text{O}_2$ -saturated  $0.1 \text{ M KOH}$  electrolyte using a three-electrode system. Working electrode was fabricated as follows: the mixture of  $\text{Fe}_3\text{C}/\text{MoN}$  ( $2 \text{ mg}$ ) and conductive carbon black (Vulcan XC-72R,  $8 \text{ mg}$ ) was dispersed in aqueous solution of water ( $0.8 \text{ mL}$ ), ethanol ( $0.15 \text{ mL}$ ) and  $50 \text{ }\mu\text{L}$  Nafion ( $5 \%$ ). The ink ( $10 \text{ }\mu\text{L}$ ) was dropped on RRDE (electrode area is  $0.2475 \text{ cm}^2$ ) and served as working electrode. Graphite electrode and Ag/AgCl electrode ( $3 \text{ M KCl}$ ) were employed as counter and reference electrodes. The disk potential was cycled from  $0$  to  $1.0 \text{ V}$  (vs. RHE) with a rotation rate of  $10 \text{ mV}\cdot\text{s}^{-1}$ . The ring potential was constant at  $1.2 \text{ V}$  (vs. RHE). The  $\text{H}_2\text{O}_2$  selectivity ( $\text{H}_2\text{O}_2\%$ ) and electron transfer number ( $n$ ) were calculated with Eq. 1 and 2. In these equations,  $I_D$  and  $I_R$  represent disk and ring currents density.  $N$  ( $N = 0.37$ , obtained from  $\text{K}_3\text{Fe}(\text{CN})_6$  reduction experiments at various rotation rates) is the current collection efficiency of the Pt ring.

$$\text{H}_2\text{O}_2\% = (200 \times I_{\text{R}}/N)/(I_{\text{R}}/N + I_{\text{D}}) \quad (1)$$

$$n = 4 \times I_{\text{d}}/(I_{\text{R}}/N + I_{\text{D}}) \quad (2)$$

### RDE test in ORR

RDE tests were also conducted in an O<sub>2</sub>-saturated 0.1 M KOH electrolyte using a three-electrode system, in which Graphite electrode and Ag/AgCl electrode (3 M KCl) were employed as counter and reference electrodes. Working electrode was fabricated as follows: the mixture of Fe<sub>3</sub>C/MoN (2 mg) and carbon black (8 mg) was dispersed in aqueous solution of water (0.8 mL), ethanol (0.15 mL) and 50 μL Nafion (5 %). The ink (10 μL) was dropped on RDE (electrode area is 0.196 cm<sup>2</sup>) and served as working electrode. Linear sweep voltammetry (LSV) was recorded at 10 mV·s<sup>-1</sup>. The rotating rates of RDE were 400, 625, 900, 122, 1600, 2025 and 2500 rpm. The electron transfer number was calculated by using the Koutechy-Levich (K-L) equation (Eq. 3). In this equation,  $j$  is the measured current density,  $j_{\text{k}}$  is the kinetic current density,  $\omega$  is the electrode rotating rate. The parameter  $B$  could be calculated from the slope of the K-L plots based on the following Levich equation (Eq. 4), in which  $n$  is the electron transfer number per oxygen molecule,  $F$  is the Faraday constant ( $F=96485 \text{ C}\cdot\text{mol}^{-1}$ ),  $D_0$  is the diffusion coefficient of O<sub>2</sub> in 0.1 M KOH ( $D_0 = 1.9 \times 10^{-5} \text{ cm}^2\cdot\text{s}^{-1}$ ),  $\nu$  is the kinetic viscosity ( $\nu = 0.01 \text{ cm}^2\cdot\text{s}^{-1}$ ) and  $C_0$  is the bulk concentration of O<sub>2</sub> ( $C_0 = 1.2 \times 10^{-6} \text{ mol}\cdot\text{cm}^{-3}$ ).

$$1/j = 1/j_{\text{k}} + 1/B\omega^{1/2} \quad (3)$$

$$B = 0.62nF(D_0)^{2/3}(\nu)^{-1/6}C_0 \quad (4)$$

### OER test

OER was conducted in a N<sub>2</sub>-saturated 1 M KOH electrolyte. Three-electrode system was employed. Working electrode was fabricated as follows: the mixture of Fe<sub>3</sub>C/MoN (2 mg) and carbon black (8 mg) was dispersed in aqueous solution of

water (0.8 mL), ethanol (0.15 mL) and 50  $\mu\text{L}$  Nafion (5 %). The ink (10  $\mu\text{L}$ ) was dropped on glassy carbon (GC) electrode (electrode area is 0.196  $\text{cm}^2$ ). Graphite electrode and Ag/AgCl electrode (3 M KCl) were employed as counter and reference electrodes.

### **EIS and multi-cycle CV tests**

Electrochemical impedance spectroscopy (EIS) measurements were conducted over a frequency range of 0.01 to 100k Hz. The electrochemically active surface area (ECSA) was determined by measuring the  $C_{dl}$  within a small potential range, with rotation rates of 10, 20, 30, 40, 50, 60, 70, 80, 90, and 100  $\text{mV}\cdot\text{s}^{-1}$ .

### **Assemble of Zn-air battery**

A Zn-air battery was assembled with a home-made cell in the size  $4.2 \times 4 \times 4 \text{ cm}^3$ . The Zn plate with working area 3.2  $\text{cm}^2$  acts as negative electrode.  $\text{Fe}_3\text{C}/\text{MoN}$  ink was casted on carbon paper equipped with air diffusion layer, which was employed as positive electrode. The working area of positive electrode is also 3.2  $\text{cm}^2$ . The cell was filled with 25 mL mixed solution of 6 M KOH and 0.2 M  $\text{Zn}(\text{Ac})_2$ . For comparison, the reference catalyst was prepared by mixing commercial Pt/C and  $\text{RuO}_2$  with mass ratio of 1:1. No additional  $\text{O}_2$  was introduced during battery testing

The specific capacitance of battery was calculated based on Eq. (5). In this equation,  $j$  and  $t$  are current density and discharge time.  $\Delta m_{\text{Zn}}$  represents the mass of Zn consumed.

$$C = jt/\Delta m_{\text{Zn}} \quad (5)$$

### **Assemble of flexible Zn-air battery**

A flexible Zn-air battery was assembled in a sandwich-type configuration. The  $\text{Fe}_3\text{C}/\text{MoN}$  catalyst ink was cast onto carbon cloth and used as the air cathode, while Zn foil served as the anode. The effective working area of both electrodes was 3.2  $\text{cm}^2$ .

A quasi-solid-state electrolyte, i.e., PAAK hydrogel saturated with 6 M KOH and 0.2 M Zn(Ac)<sub>2</sub>, was introduced between the cathode and anode, followed by sealing the device with flexible packaging film. For comparison, the reference flexible Zn-air battery was fabricated using a mixed commercial Pt/C + RuO<sub>2</sub> catalyst (mass ratio = 1:1) as the air cathode under otherwise identical conditions. No additional O<sub>2</sub> was introduced during battery testing.

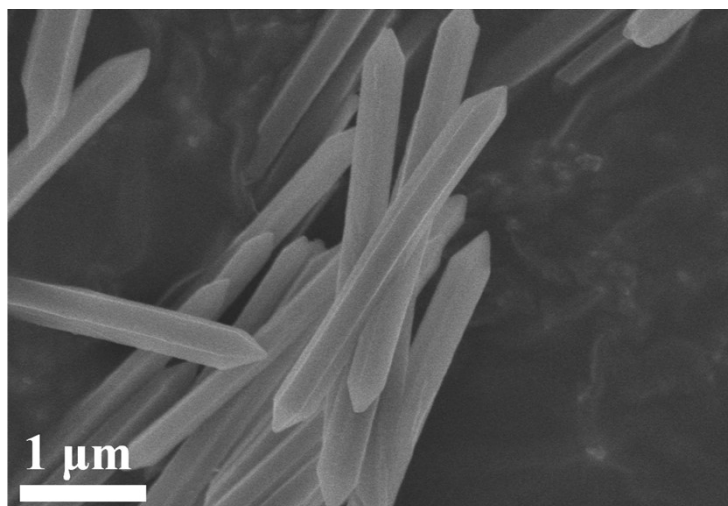

**Fig. S1.** SEM image of MIL-88A.

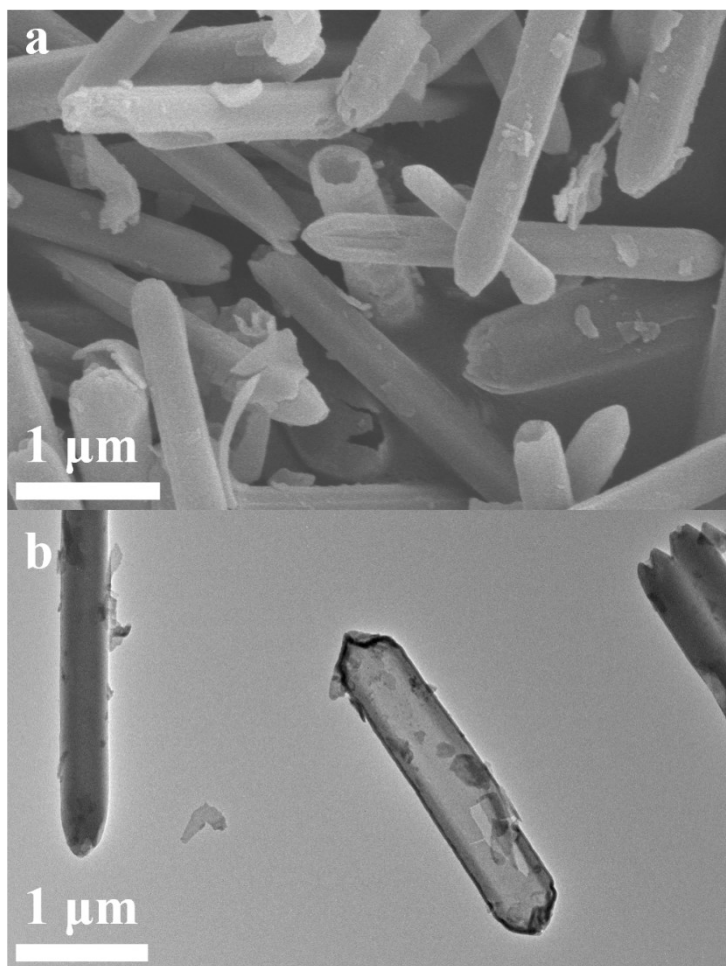

**Fig. S2.** (a) SEM and (b) TEM images of hollow Mo@MIL-88A intermediate.

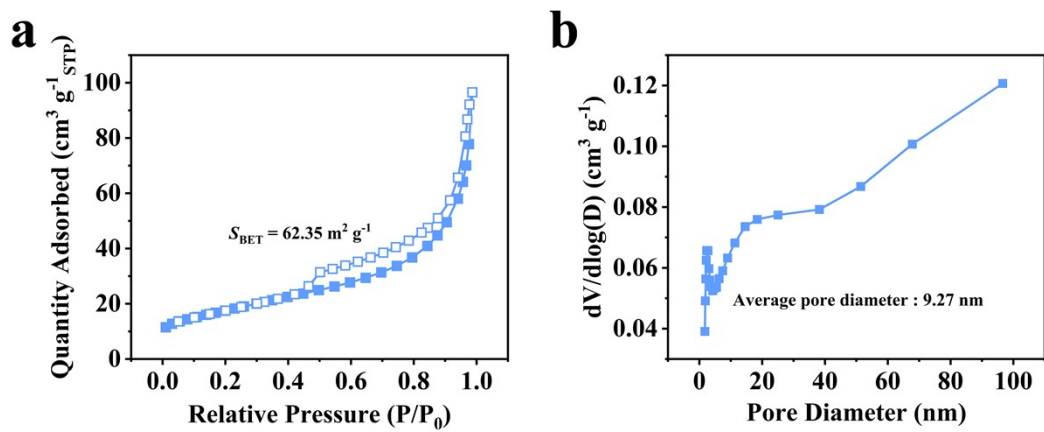

**Fig. S3.** (a) The N<sub>2</sub> adsorption–desorption isotherm and (b) pore size distribution curve of Fe<sub>3</sub>C/MoN

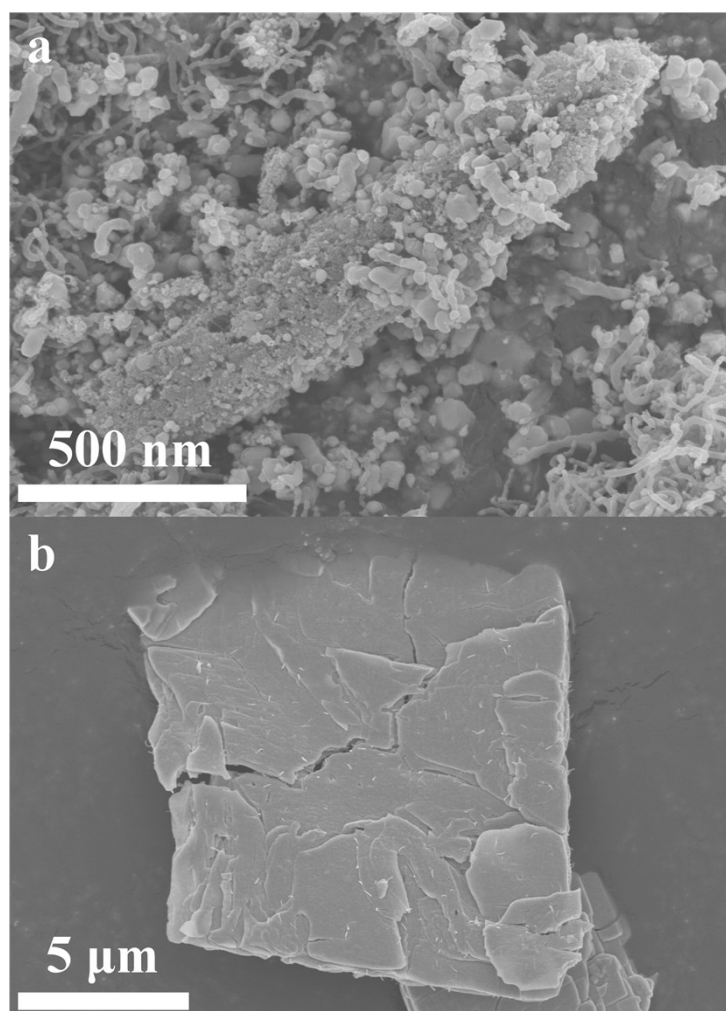

**Fig. S4.** SEM images of (a) Fe<sub>3</sub>C and (b) MoN.

Note: Without the etching treatment, the MIL-88A precursor retains a solid rod-like structure and is prone to particle agglomeration during pyrolysis, yielding a dense, particulate rod-like Fe<sub>3</sub>C rather than a hollow porous architecture. Meanwhile, owing to the bulky nature of the NiMo<sub>6</sub> polyoxometalate precursor, the derived MoN also lacks a well-defined morphology.

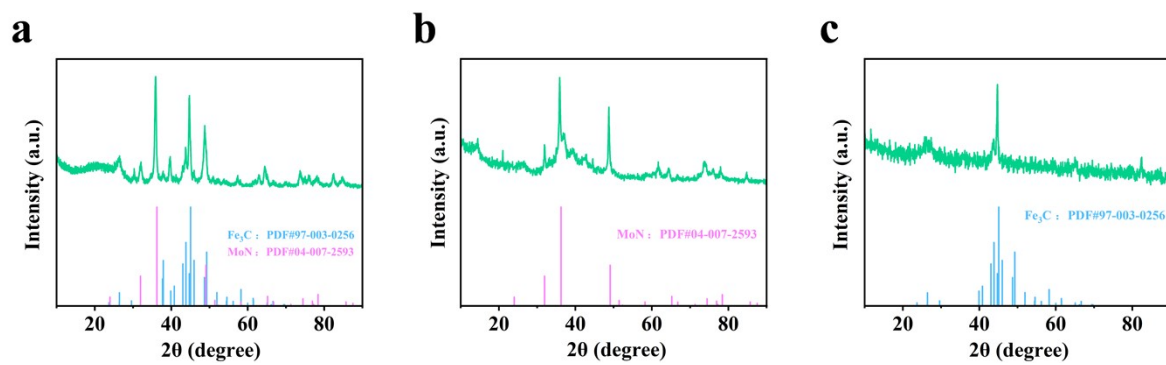

**Fig. S5.** XRD patterns of (a) Fe<sub>3</sub>C/MoN, (b) MoN, and (c) Fe<sub>3</sub>C.

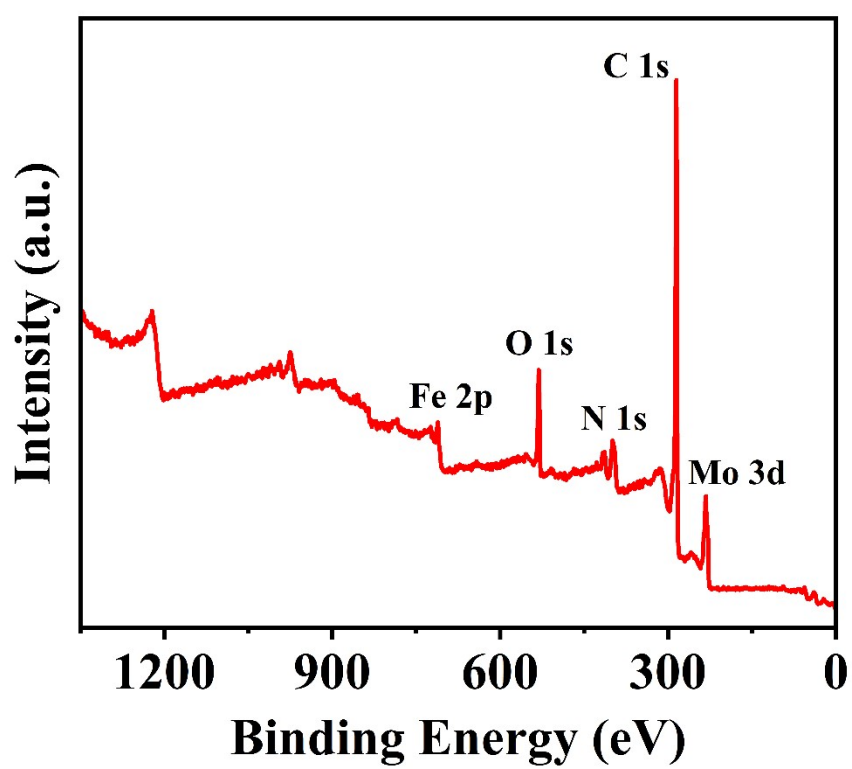

Fig. S6. XPS survey spectrum of Fe<sub>3</sub>C/MoN.

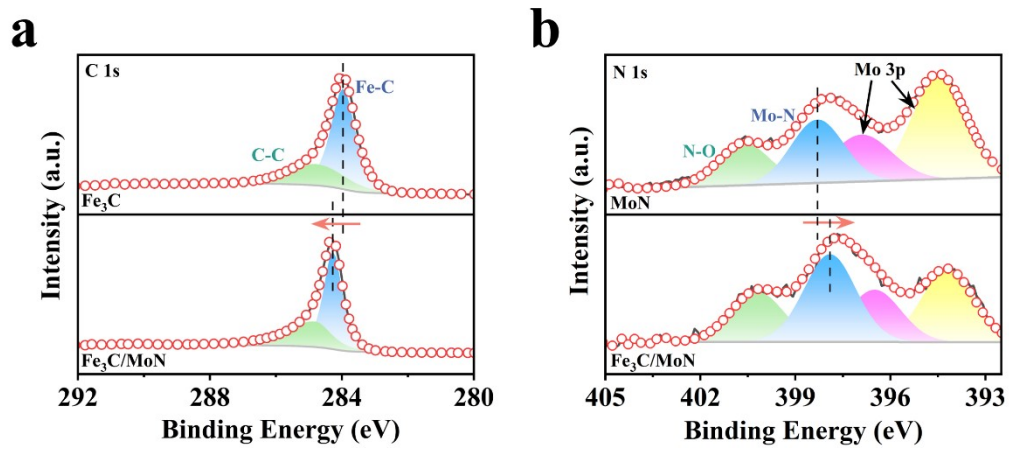

**Fig. S7.** (a) C 1s and (b) N 1s XPS spectra.

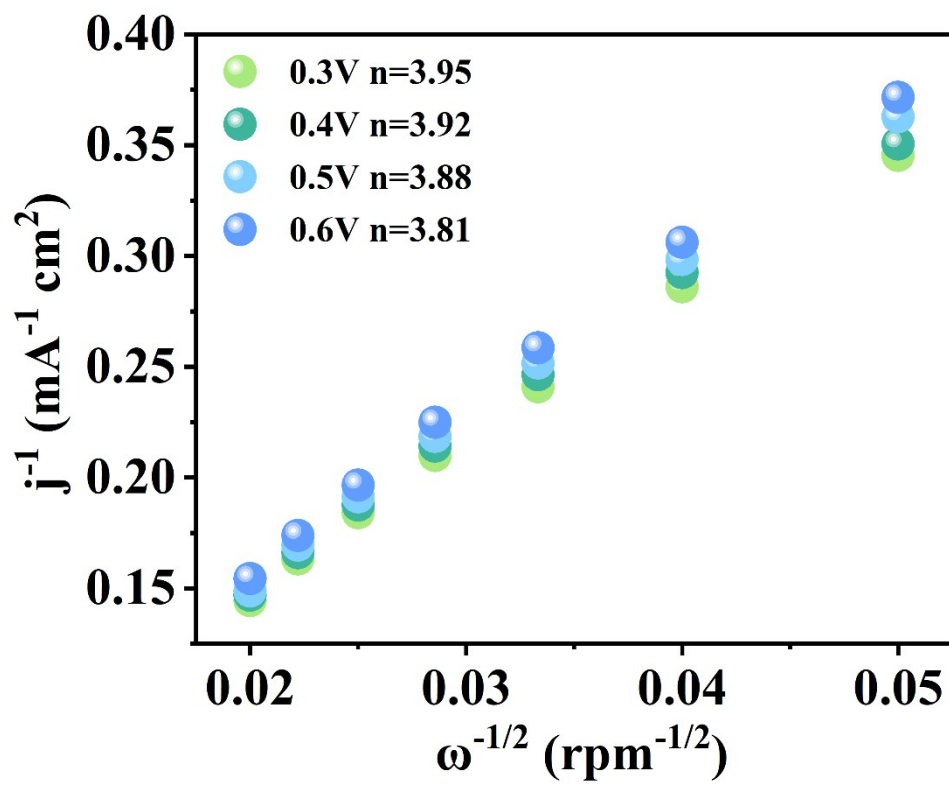

Fig. S8. K-L equation simulation of Fe<sub>3</sub>C/MoN.

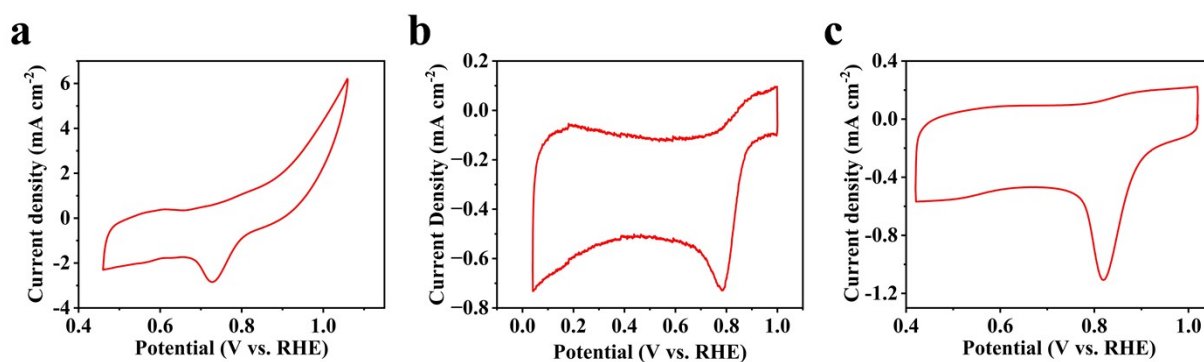

**Fig. S9.** CV curves of (a) Fe<sub>3</sub>C, (b) MoN, and (c) commercial Pt/C in O<sub>2</sub>-saturated 0.1M KOH electrolyte.

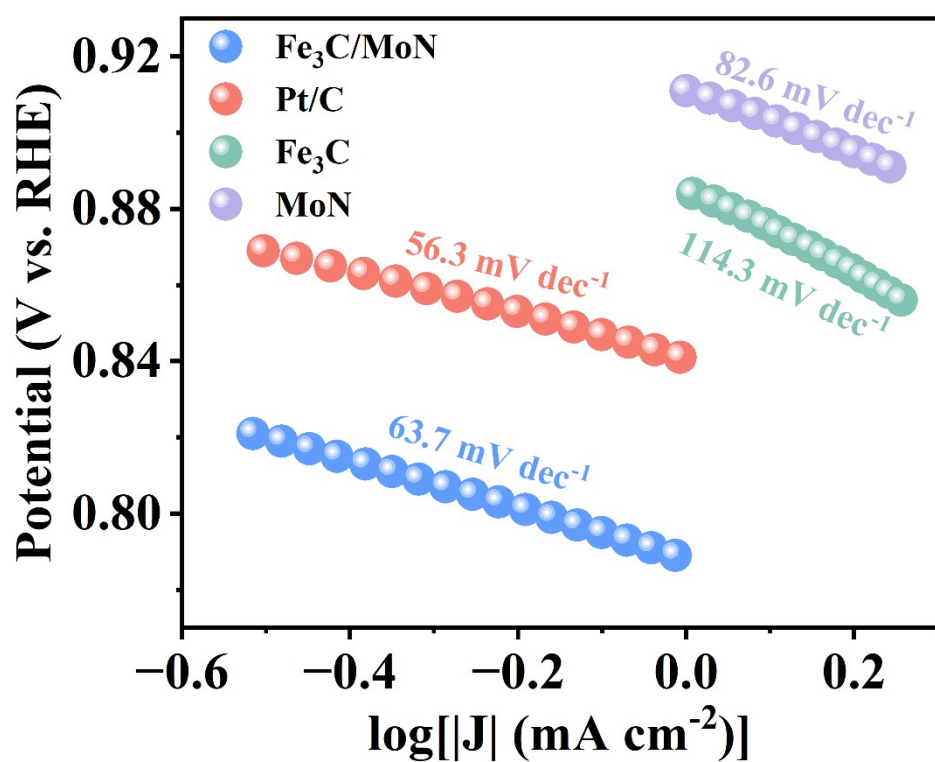

Fig. S10. ORR Tafel plots of Fe<sub>3</sub>C/MoN, Fe<sub>3</sub>C, MoN and Pt/C.

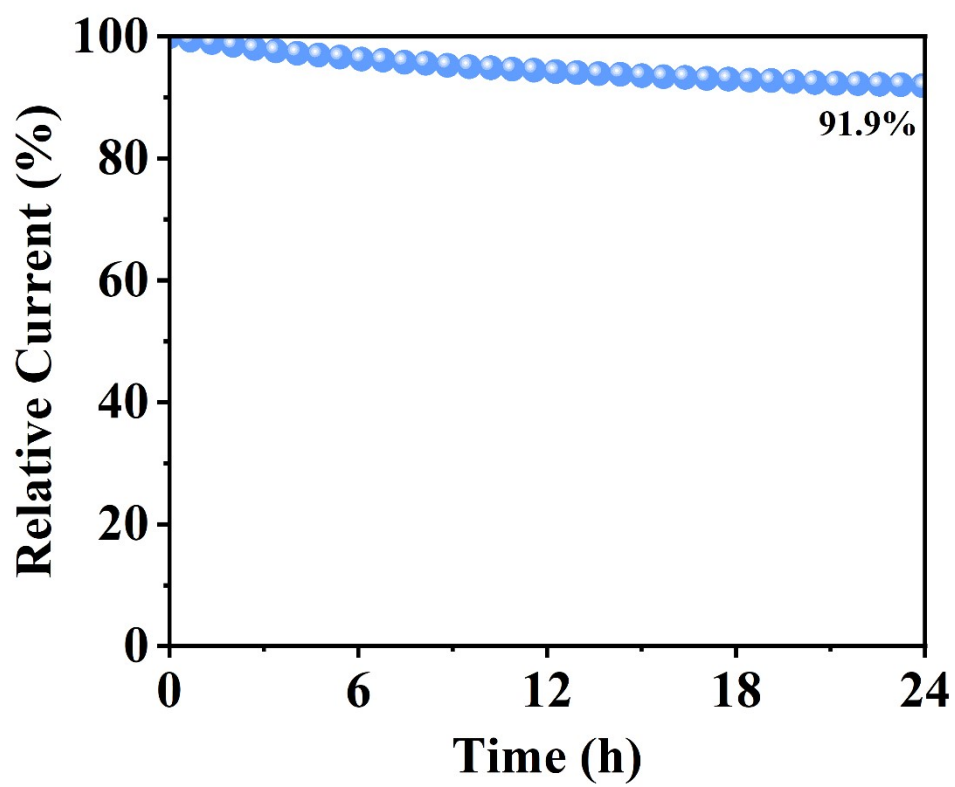

Fig. S11. Chronoamperometric ( $i-t$ ) response of  $\text{Fe}_3\text{C}/\text{MoN}$  for ORR at  $E_{1/2}$ .

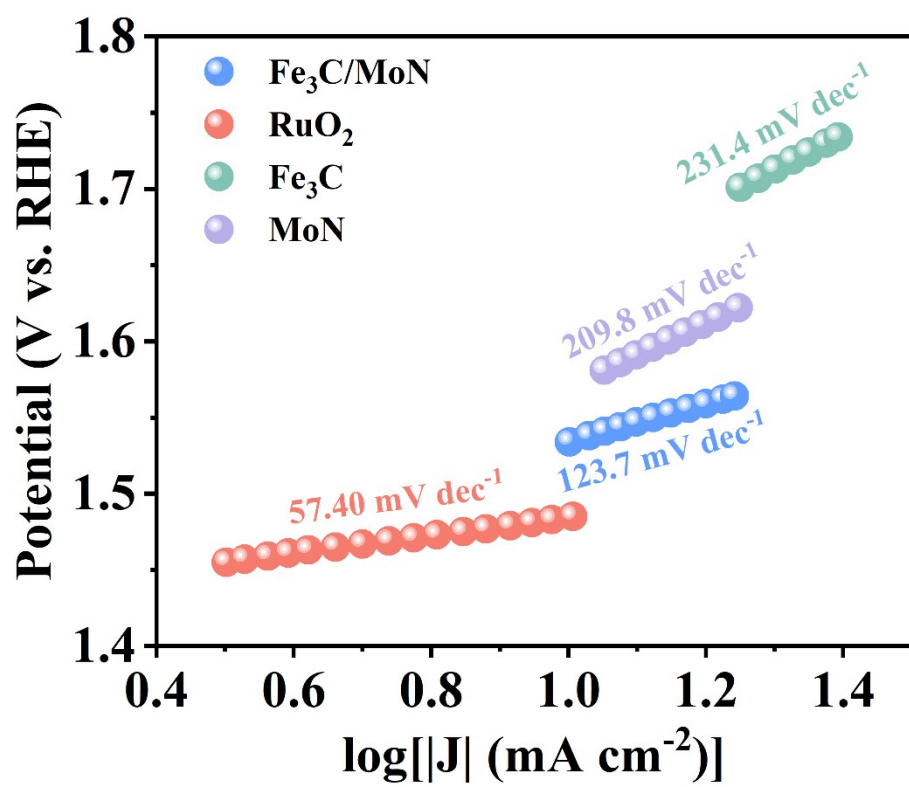

Fig. S12. OER Tafel plots of Fe<sub>3</sub>C/MoN, Fe<sub>3</sub>C, MoN and RuO<sub>2</sub>.

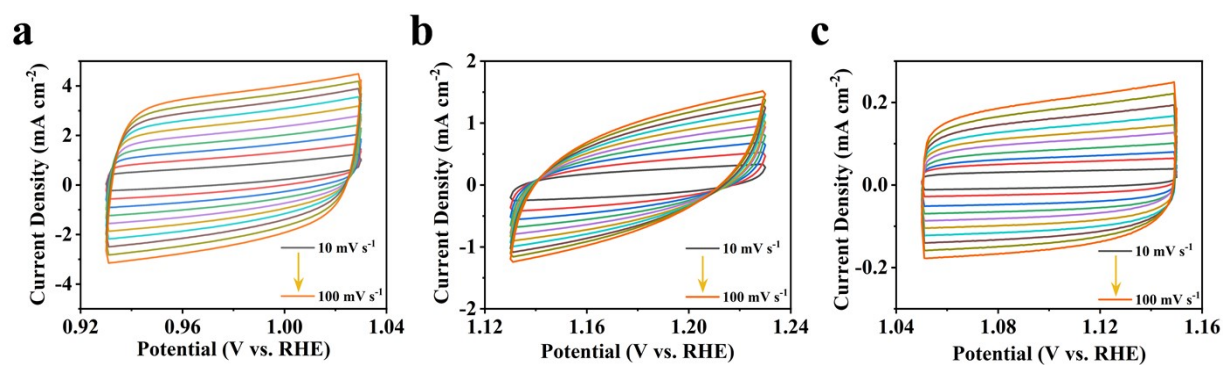

**Fig. S13.** CV curves of (a) Fe<sub>3</sub>C/MoN, (b) Fe<sub>3</sub>C, and (c) MoN at various scan rates.

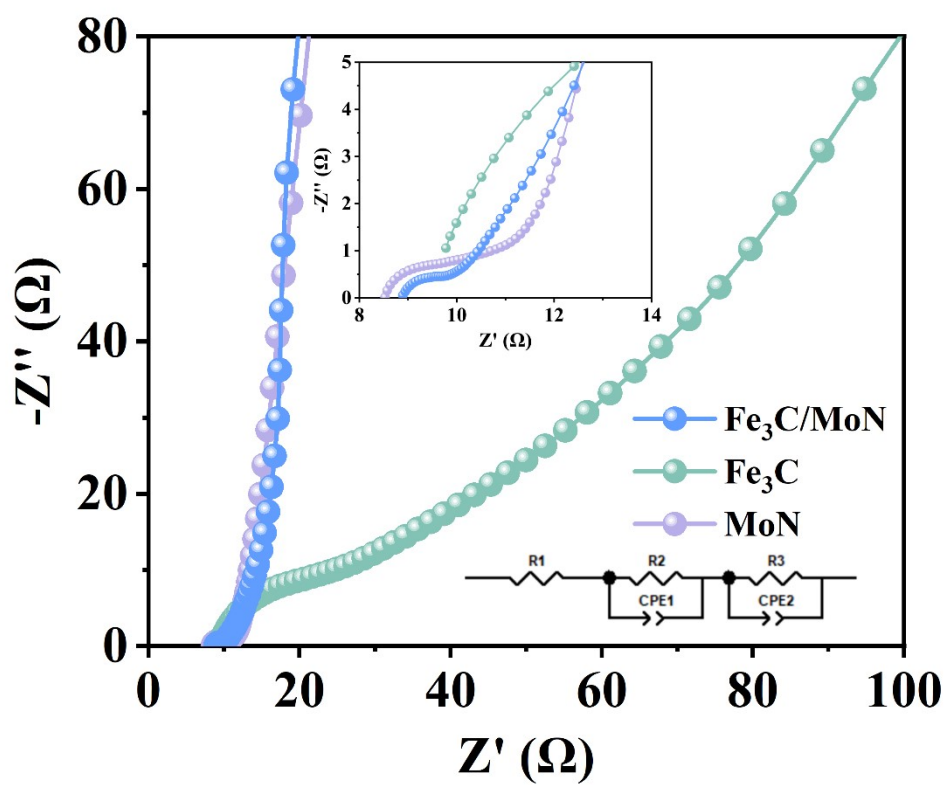

Fig. S14. Nyquist plots of Fe<sub>3</sub>C/MoN, Fe<sub>3</sub>C, and MoN.

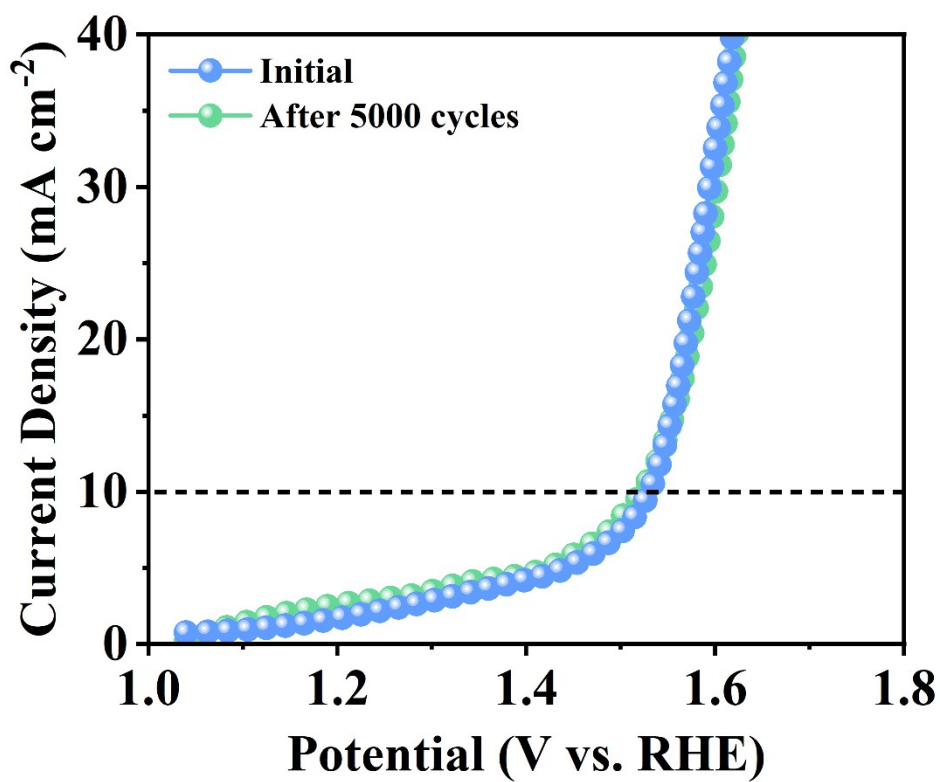

Fig. S15. OER LSV curves of Fe<sub>3</sub>C/MoN before and after 5000 CV cycles.

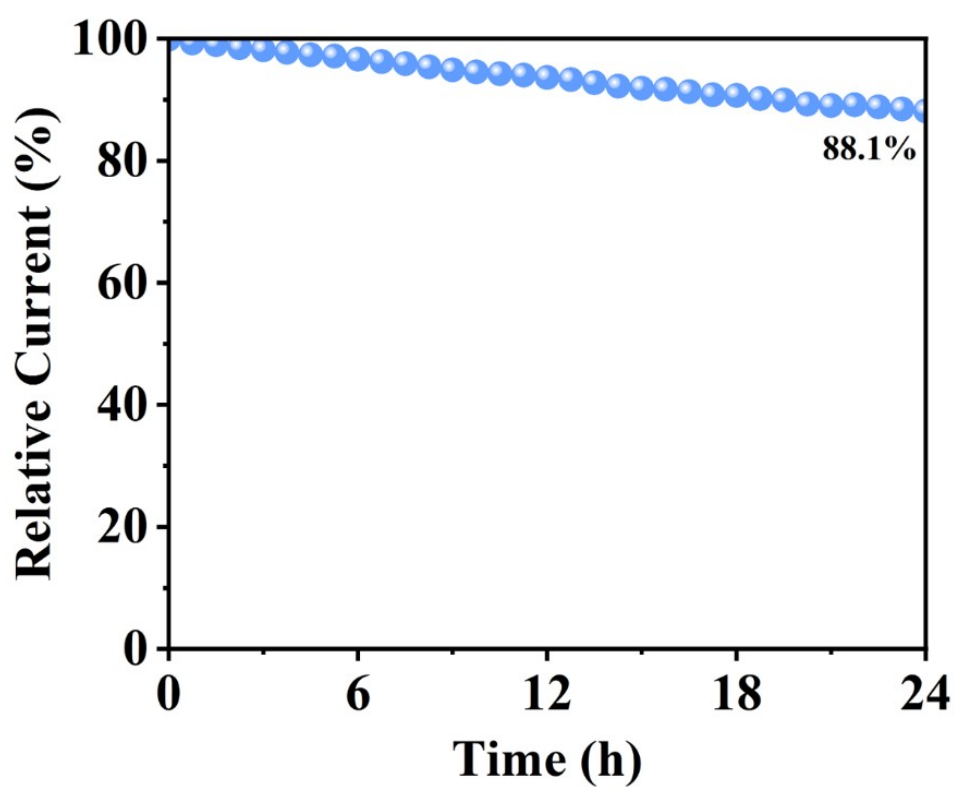

**Fig. S16.** *i-t* response of Fe<sub>3</sub>C/MoN for OER at  $E_j=10$ .

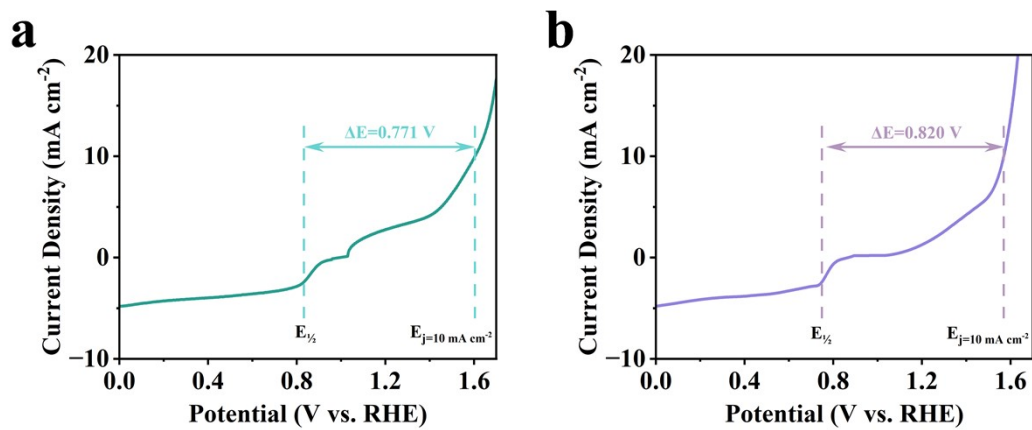

Fig. S17.  $\Delta E$  values of (a) Fe<sub>3</sub>C and (b) MoN.

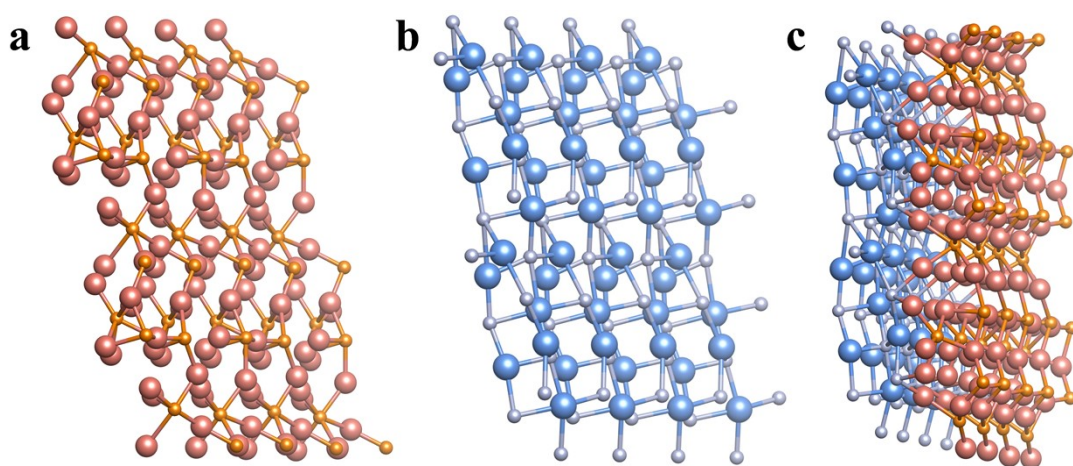

**Fig. S18.** Optimized structural models of (a) Fe<sub>3</sub>C, (b) MoN, and (c) Fe<sub>3</sub>C/MoN.

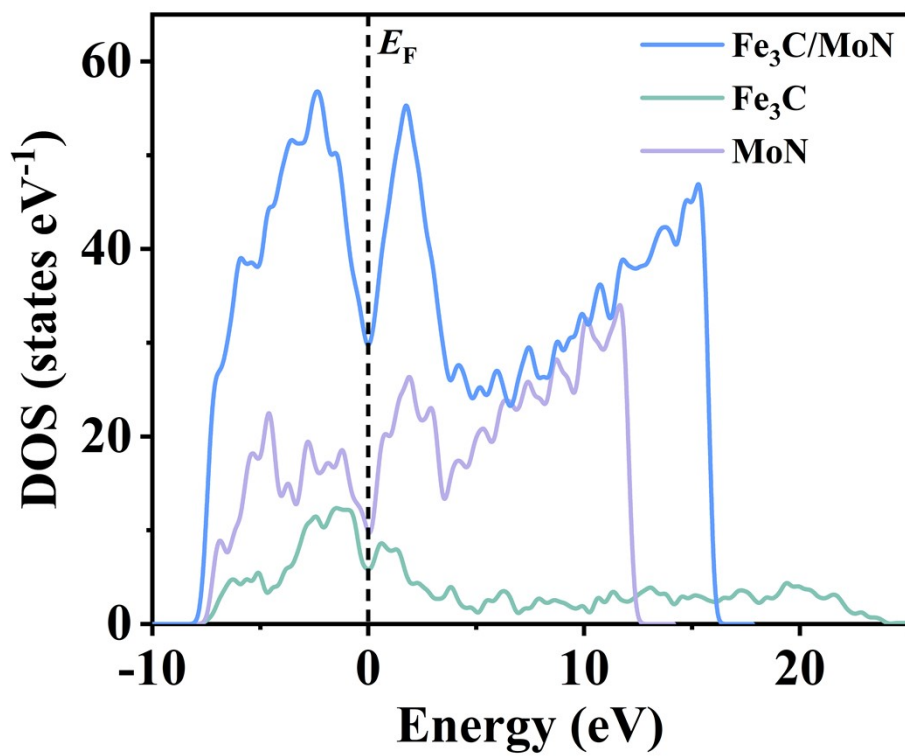

**Fig. S19.** Calculated DOS of Fe<sub>3</sub>C, MoN, and Fe<sub>3</sub>C/MoN with the Fermi level set to 0 eV.

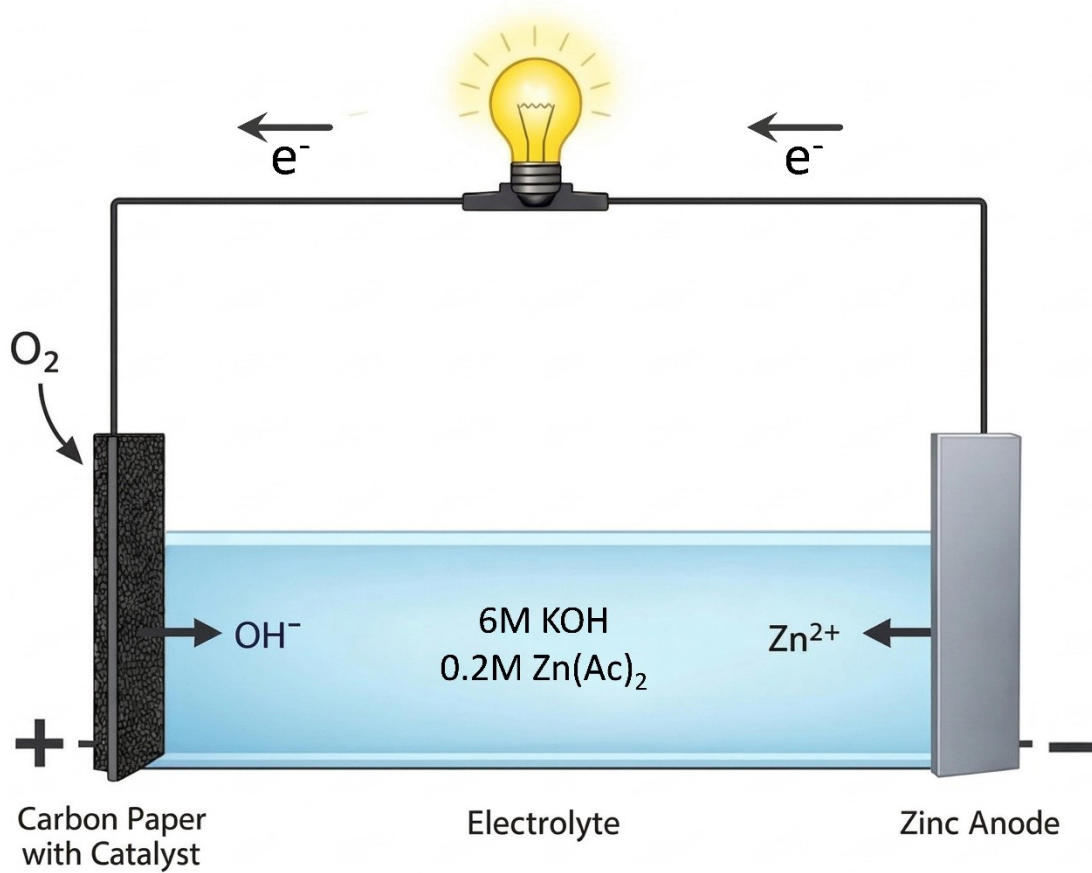

**Fig. S20.** Schematic illustration of the assembled ZAB.

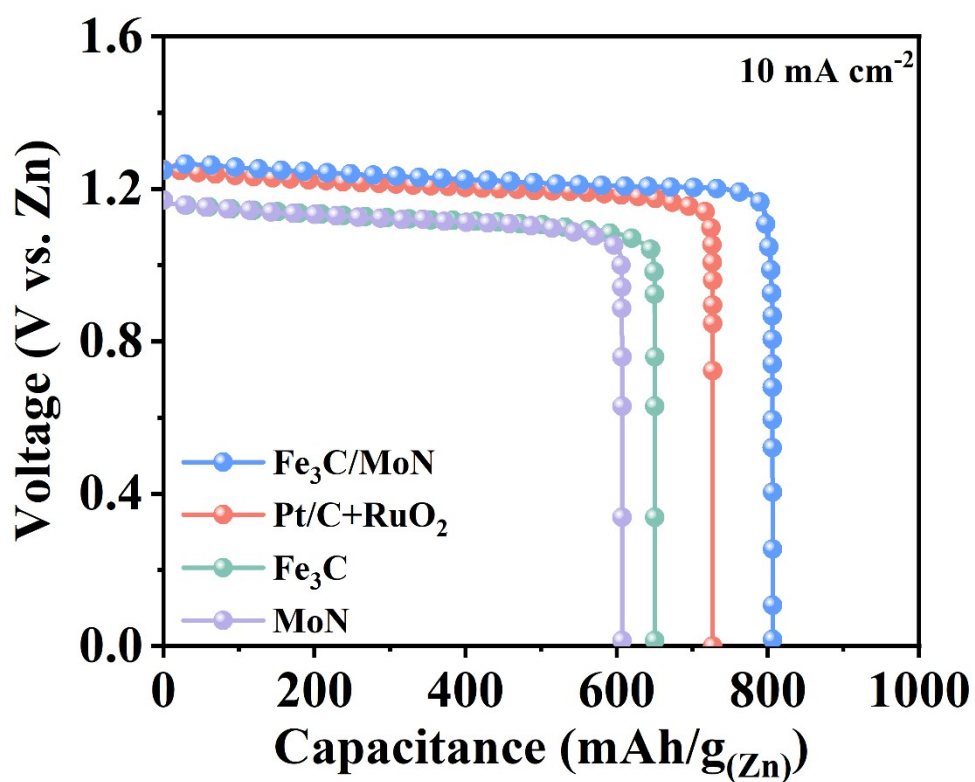

Fig. S21. Specific capacity of ZABs based on Fe<sub>3</sub>C/MoN, Fe<sub>3</sub>C, MoN and Pt/C + RuO<sub>2</sub> at 10 mA cm<sup>-2</sup>.

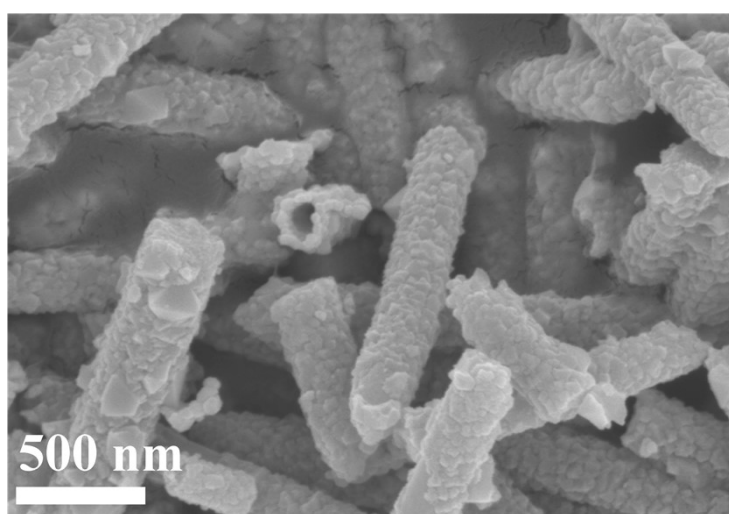

**Fig. S22** SEM image of Fe<sub>3</sub>C/MoN after 200 h ZAB GCD cycling.

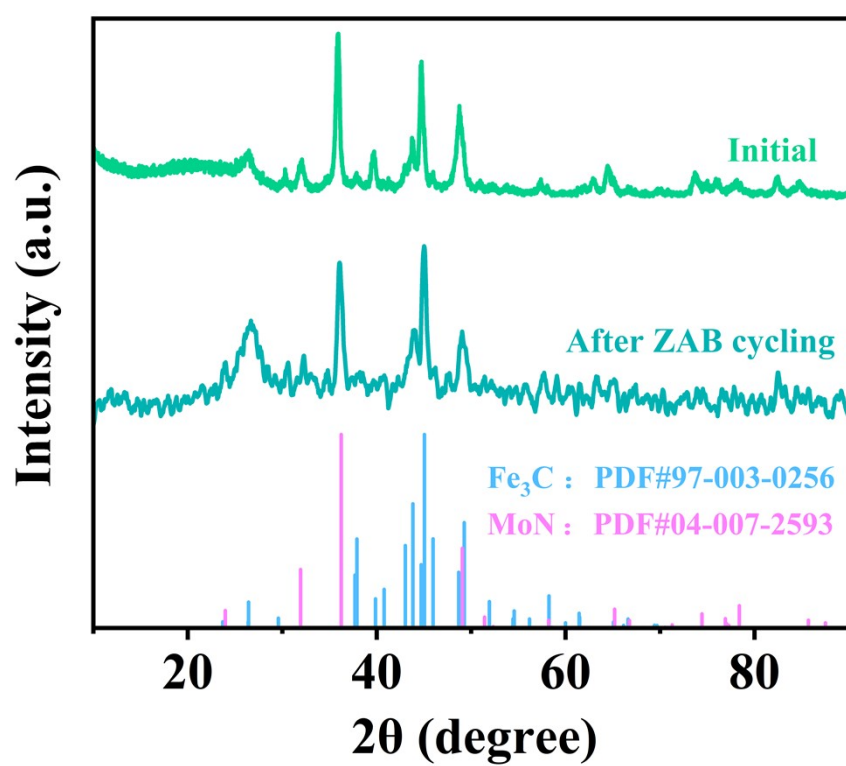

Fig. S23. XRD patterns of Fe<sub>3</sub>C/MoN before and after 200 h ZAB GCD cycling.

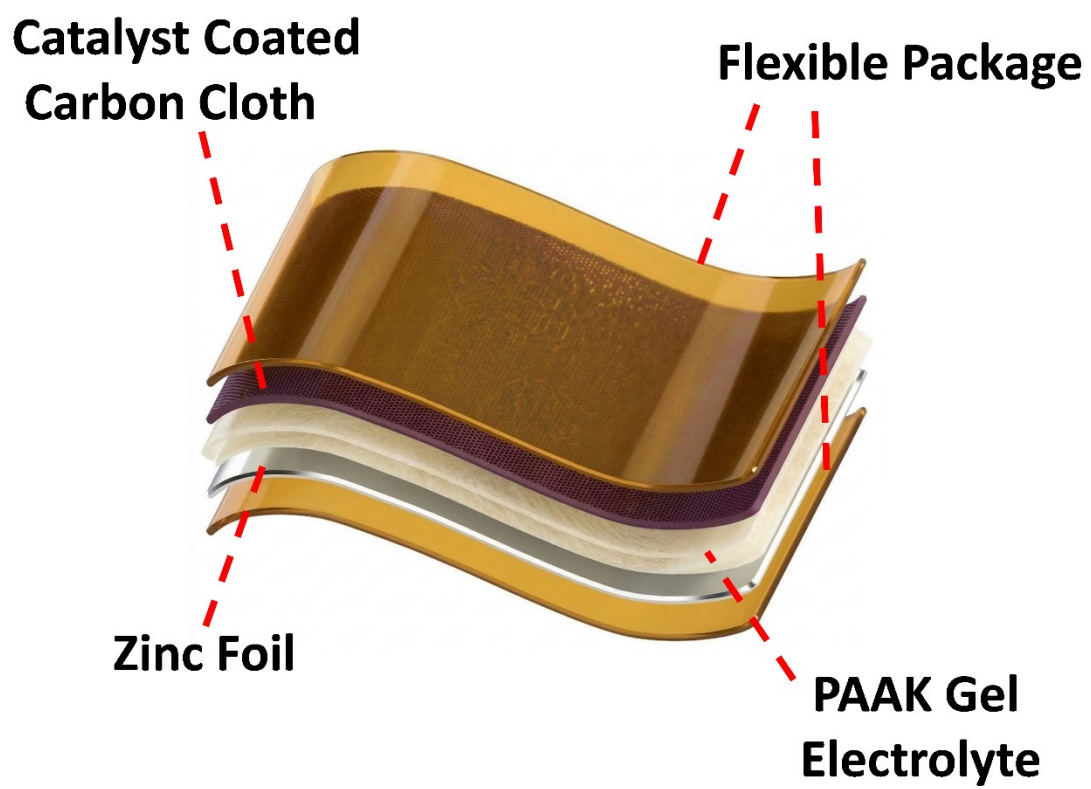

Fig. S24. Schematic illustration of the assembled FZAB.

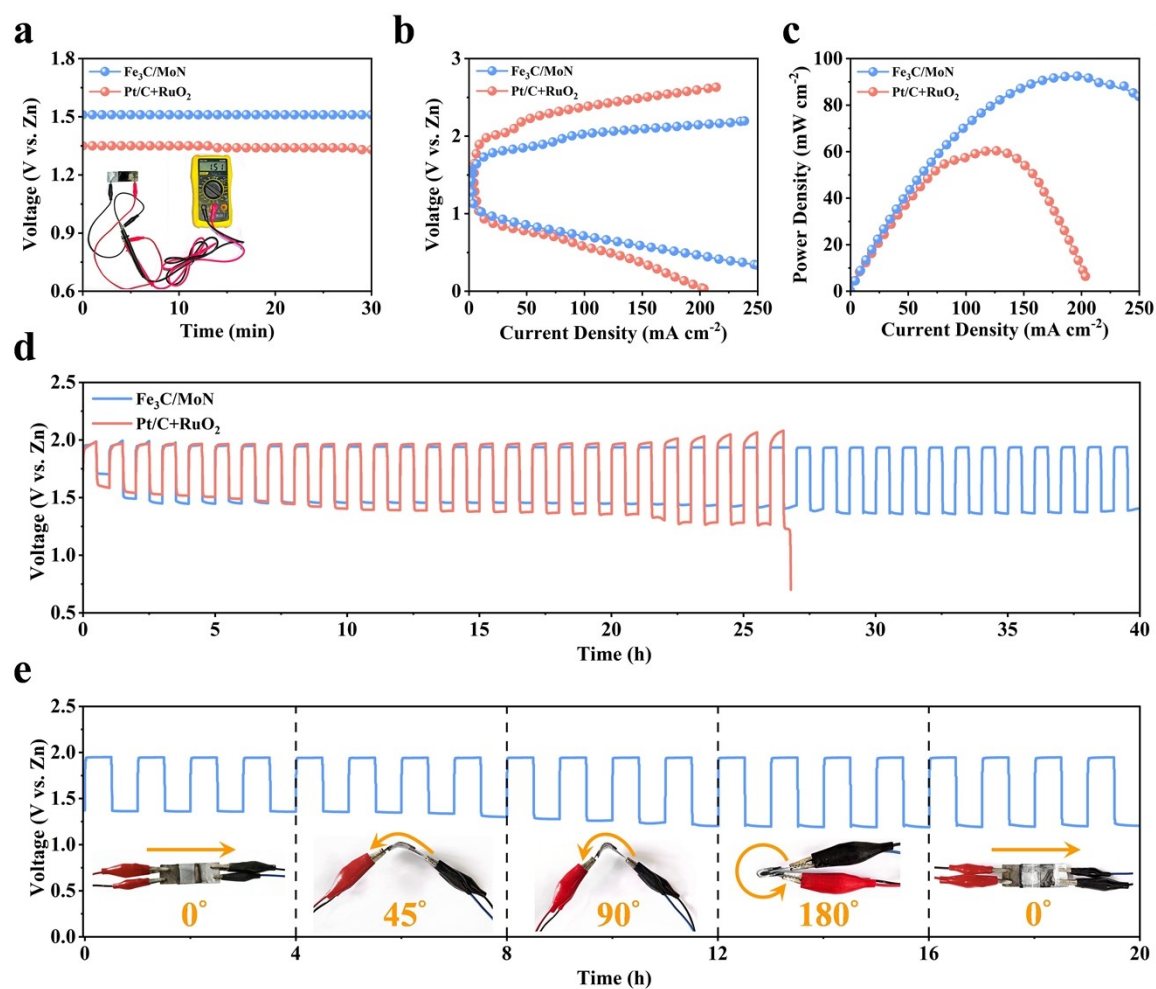

**Fig. S25** (a) OCV curves, (b) polarization curves, (c) power density curves and (d) GCD cycling curves of  $\text{Fe}_3\text{C}/\text{MoN}$ - and  $\text{Pt}/\text{C} + \text{RuO}_2$ -based FZABs; (e) GCD cycling curve of  $\text{Fe}_3\text{C}/\text{MoN}$ -based FZAB under various bending angles.

**Table S1.** Surface elemental composition of **Fe<sub>3</sub>C/MoN** determined by XPS survey spectra.

| Element | Atomic percentage (at.%) |
|---------|--------------------------|
| Fe      | 4.69                     |
| Mo      | 2.91                     |
| C       | 69.97                    |
| N       | 8.91                     |
| O       | 13.51                    |

Note: The detected O species mainly arise from surface oxidation of **Fe<sub>3</sub>C/MoN** and adsorbed oxygen species upon air exposure.

**Table S2.** Comparison of OER and ORR activities of **Fe<sub>3</sub>C/MoN** with other Fe/Mo-based bifunctional electrocatalysts.

| Electrocatalyst                                         | $E_{1/2}$ (V) | $\eta_{10}$ (mV) | $\Delta E$ (V) | Reference        |
|---------------------------------------------------------|---------------|------------------|----------------|------------------|
| <b>Fe<sub>3</sub>C/MoN</b>                              | <b>0.854</b>  | <b>305</b>       | <b>0.681</b>   | <b>This work</b> |
| FeCo/MoN@NCNTs                                          | 0.845         | 370              | 0.755          | s1               |
| FeMo/NCPs                                               | 0.85          | 390              | 0.77           | s2               |
| VN/Fe <sub>3</sub> C@NCNT                               | 0.845         | 337              | 0.722          | s3               |
| Fe <sub>3</sub> C/MnO-NC                                | 0.86          | 370              | 0.74           | s4               |
| Ce/Fe-NC/Fe <sub>3</sub> C-P                            | 0.87          | 389              | 0.749          | s5               |
| FeMn-NC                                                 | 0.84          | 390              | 0.78           | s6               |
| Fe/Fe <sub>3</sub> C@Fe-S-N-C                           | 0.81          | 410              | 0.83           | s7               |
| (Fe <sub>3</sub> C, Fe <sub>3</sub> P)/NC               | 0.85          | 497              | 0.877          | s8               |
| Co-Co <sub>6</sub> Mo <sub>6</sub> C <sub>2</sub> /CNFs | 0.80          | 293              | 0.723          | s9               |
| Mo <sub>2</sub> C/MoC/Co@CNTs                           | 0.82          | 330              | 0.74           | s10              |
| Mo <sub>2</sub> C-MoO <sub>2</sub> /CMTs                | 0.80          | 320              | 0.75           | s11              |
| G-SHELL                                                 | 0.72          | 320              | 0.83           | s12              |
| NC@MoS <sub>2</sub> @Co-Fe                              | 0.73          | 400              | 0.90           | s13              |

## References

- [s1] Y. Zhang, W. Xue, Y. Ding, J. Chen and X. Xu, *Inorg. Chem. Commun.*, 2025, **177**, 114374.
- [s2] J. Hu, S. Pang, S. Gao, H. Yu, N. Duan and S. Hu, *Compos. Part B Eng.*, 2025, **304**, 112695.
- [s3] X. Li, J. Huang, D. Chu, L. Cao, X. Zhang, Q. Chen, K. Kajiyoshi, Y. Liu and L. Feng, *Energy*, 2025, **319**, 135045.
- [s4] J. Zhong, Q. Xu, R. Li and D. Yuan, *Appl. Catal. B: Environ. Energy*, 2025, **361**, 124615.
- [s5] L. Wang, X. Liu, K. Su, W. Liu, F. Niu, X. Li, H. Yue, H. Dong, S. Yang and Y. Yin, *ACS Appl. Nano Mater.*, 2024, **7**, 22855–22864.
- [s6] R. Li, D. Zhu, L. Peng, Y. Yang, K. Qi and D. Yuan, *J. Energy Storage*, 2025, **131**, 117513.
- [s7] T. Luo, W. Huan, J. Liang, P. Wang, T. Liu, Z. Long, J. Li, J. Shuai, P. Zhu, X. Zhao and S. Liu, *J. Energy Storage*, 2026, **151**, 120522.
- [s8] S. Xiao, P. Zheng, L. Han, Q. Luo, S. Long, X. Zeng, Y. Zhang and P. Dong, *ACS Appl. Energy Mater.*, 2024, **8**, 529–537.
- [s9] S. Xu, Y. Feng, J. Bai, X. Sun and C. Li, *J. Alloys Compd.*, 2024, **1005**, 176151.
- [s10] C. Xu, J. Zuo, J. Wang and Z. Chen, *J. Power Sources*, 2024, **595**, 234063.
- [s11] X. Zhang, X. Zhu, X. Liu, X. Liu and S. Alwarappan, *Small*, 2025, **21**, e2502395.
- [s12] D. W. Kim, J. Kim, J. H. Choi, D. H. Jung and J. K. Kang, *Adv. Sci.*, 2024, **11**, e2408869.
- [s13] X. Shang, Q. Shen, Y. Xiong, Z. Jiang, C. Qin, X. Tian, X. Yang and Z.-J. Jiang, *J. Alloys Compd.*, 2022, **916**, 165482.
